# Supplementary material for: Identifying drivers of surface ozone bias in global chemical reanalysis with explainable machine learning
Source: Copernicus journal article supplement (doi:10.5194/acp-25-8507-2025), 2025-08-06
Supplement: Supplementary file 1 [file acp-25-8507-2025-supplement.pdf]

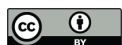

*Supplement of*

## **Identifying drivers of surface ozone bias in global chemical reanalysis with explainable machine learning**

**Kazuyuki Miyazaki et al.**

*Correspondence to:* Kazuyuki Miyazaki ([kazuyuki.miyazaki@jpl.nasa.gov](mailto:kazuyuki.miyazaki@jpl.nasa.gov))

The copyright of individual parts of the supplement might differ from the article licence.

(a) Ps, June

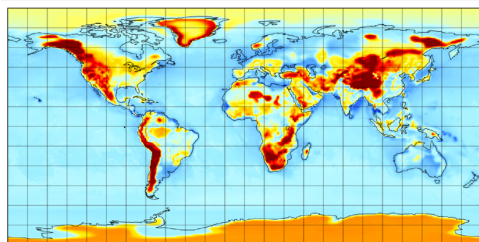

(b) rfluxsd, April

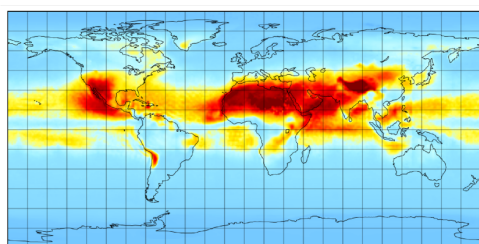

(c) rfluxld, April

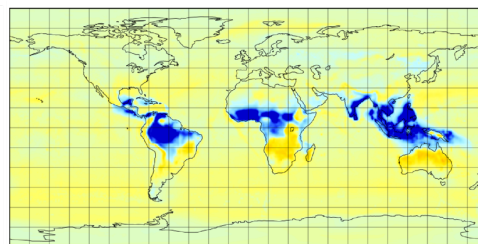

(d) noxflux, June

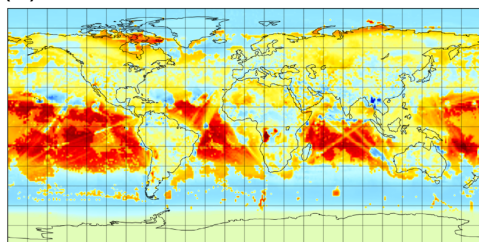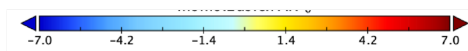

Figure S1. Spatial maps of the contributions of key parameters to monthly ozone bias, showcasing prominent drivers during specific months.

## Bias contributor's covariance: North America

(a) January

(b) July

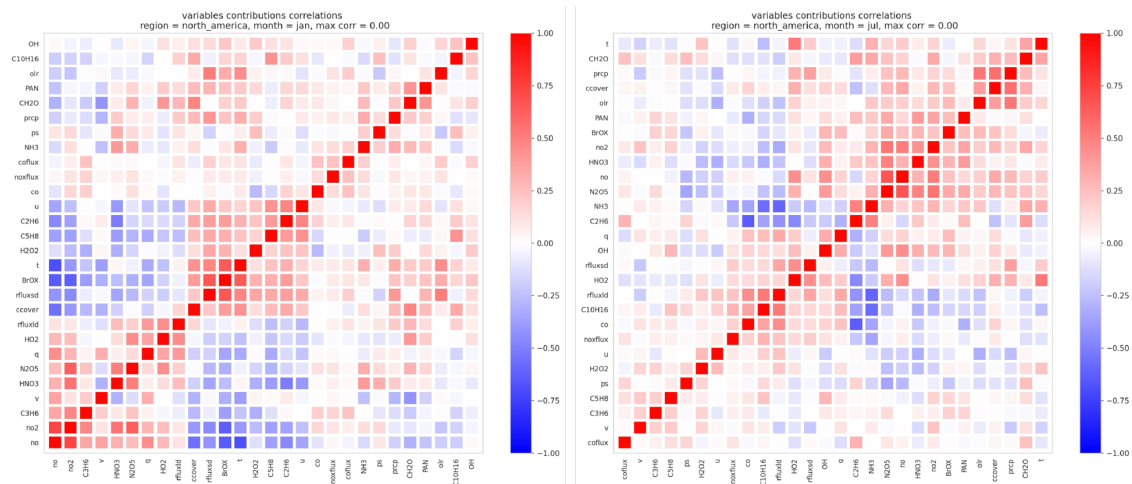

Figure S2. Covariance matrix among surface ozone contributors for North America in (a) January and (b) July.
